# Supplementary material for: Midwives’ and patients’ perspectives on disrespect and abuse during labor and delivery care in Ethiopia: a qualitative study
Source: Springer Nature journal article supplement (doi:10.1186/s12884-017-1442-1), 2017-08-22
Supplement: MOESM2 [file 14233046]

TOURO UNIVERSITY, CALIFORNIA - DEBRE MARKOS UNIVERSITY  
WOMEN-CENTERED MIDWIFERY PILOT STUDY CODEBOOK

**Midwifery Student/Midwife Demographic Data**

Interview number, Sex; Education; Marital status; Parity (birth); Age; MW type (Bachelor’s Degree or Accelerated Midwife; practicing or student); Facility work at (for midwives)

**Table 1: Midwifery Students and Midwives Codebook**

| CODE                                                                                        | EXPLANATION                                                                                                                                                                                                                                                                                                                                                                       | NOTES |
|---------------------------------------------------------------------------------------------|-----------------------------------------------------------------------------------------------------------------------------------------------------------------------------------------------------------------------------------------------------------------------------------------------------------------------------------------------------------------------------------|-------|
| <b>MIDWIVES’ TRAINING</b>                                                                   |                                                                                                                                                                                                                                                                                                                                                                                   |       |
| Satisfaction with training                                                                  | Whether happy with training                                                                                                                                                                                                                                                                                                                                                       |       |
| Adequacy of training                                                                        | Sufficiency of training (practical, didactic), whether there are any perceived gaps<br><br>Subcodes (list of specific issues mentioned) <ul style="list-style-type: none"> <li>• Equipment</li> <li>• Practice time</li> <li>• Variety of experience</li> </ul>                                                                                                                   |       |
| Coverage of professional ethics in training                                                 | Does the respondent indicate whether this topic was covered during training, if yes, how does she describe it?<br><br>Subcodes (list of specific rights mentioned) <ul style="list-style-type: none"> <li>• Privacy</li> <li>• Confidentiality</li> </ul>                                                                                                                         |       |
| Coverage of patients’ rights in training                                                    | Does the respondent indicate whether this topic was covered during training, if yes, how does she describe it?<br><br>Subcodes (list of specific rights mentioned) <ul style="list-style-type: none"> <li>• Privacy</li> <li>• Confidentiality</li> </ul>                                                                                                                         |       |
| Respondent’s knowledge and understanding of patients’ rights                                | Which elements of patients’ rights the respondent identifies during the interview conversation (whether leaves anything out on the survey form)                                                                                                                                                                                                                                   |       |
| <b>PERCEPTIONS OF FACILITY-BASED DELIVERY</b>                                               |                                                                                                                                                                                                                                                                                                                                                                                   |       |
| Views on rationales for client use/non-use of facility-based labor and delivery services    | How midwife understands why some women do not come to deliver at health facilities; his/her assessment of the validity of these rationales<br><br>Subcodes (list of specific rationales mentioned) <ul style="list-style-type: none"> <li>• Language</li> <li>• Ethnicity</li> <li>• Culture</li> <li>• Education</li> <li>• Distance</li> <li>• Poor facility quality</li> </ul> |       |
| Social and traditional beliefs and practices and facility-based labor and delivery services |                                                                                                                                                                                                                                                                                                                                                                                   |       |
| Recommendations as to how to improve treatment of clients                                   |                                                                                                                                                                                                                                                                                                                                                                                   |       |
| Recommendations as to how to improve communication with clients                             |                                                                                                                                                                                                                                                                                                                                                                                   |       |
| <b>NATURE OF CLIENT-MIDWIFE INTERACTIONS (types of violations of rights/abuse observed)</b> |                                                                                                                                                                                                                                                                                                                                                                                   |       |
| Midwives and privacy during labor and delivery                                              | Whether and how the midwife describes any violations of privacy during care she/he has provided, or that she/he has                                                                                                                                                                                                                                                               |       |

| CODE                                                         | EXPLANATION                                                                                                                                                                                                                                                                                      | NOTES |
|--------------------------------------------------------------|--------------------------------------------------------------------------------------------------------------------------------------------------------------------------------------------------------------------------------------------------------------------------------------------------|-------|
|                                                              | observed, examples if any (e.g., leaving the client uncovered, conducting vaginal exams when others are around, etc.) Whether or not she/he recognizes these as violations of privacy                                                                                                            |       |
| Client-Midwife communications                                |                                                                                                                                                                                                                                                                                                  |       |
| Midwives and confidentiality during labor and delivery       | Whether and how the midwife describes any violations of confidentiality by herself or other midwives, whether or not she recognizes these as a violation of confidentiality (e.g., talking about the client's case when other patients can hear)                                                 |       |
| Midwives and insults                                         | Whether the respondent midwife has insulted/berated a client, or whether the respondent has heard another midwife berate clients                                                                                                                                                                 |       |
| Positioning for birth                                        | Whether the respondent allows the client to choose her own position for delivery                                                                                                                                                                                                                 |       |
| Presence of relatives during labor and delivery (if desired) | Whether client's relatives were present at labor and delivery; whether she requested this; whether she wanted this                                                                                                                                                                               |       |
| Medical errors                                               | Recognition of whether medical errors are made during the course of the care the midwife provided or observed being provided                                                                                                                                                                     |       |
| Explanations for violations of rights observed               | Subcodes <ul style="list-style-type: none"> <li>• Adequacy of equipment in the health facility</li> <li>• High patient load</li> <li>• Stress</li> <li>• Culture/Traditional practices</li> <li>• Language/communication barrier</li> <li>• Unresponsive patient</li> <li>• Education</li> </ul> |       |

|                                                                                                                                                                                                                                                                                                                                                                                                                                                                                                                                                                                                                                                                                                                                                                                                                                                                                                                                                                                                                                                                                                                                                                                                                                                                                                                                                                                |
|--------------------------------------------------------------------------------------------------------------------------------------------------------------------------------------------------------------------------------------------------------------------------------------------------------------------------------------------------------------------------------------------------------------------------------------------------------------------------------------------------------------------------------------------------------------------------------------------------------------------------------------------------------------------------------------------------------------------------------------------------------------------------------------------------------------------------------------------------------------------------------------------------------------------------------------------------------------------------------------------------------------------------------------------------------------------------------------------------------------------------------------------------------------------------------------------------------------------------------------------------------------------------------------------------------------------------------------------------------------------------------|
| <p><b>Criteria for Coding Clinical Care Scenarios</b></p> <p><b><u>Post-partum hemorrhage</u></b></p> <ul style="list-style-type: none"> <li>▪ Did they make the correct clinical recommendations? (completely; majority)</li> </ul> <p><b><u>Unmarried adolescent seeking contraception</u></b></p> <ul style="list-style-type: none"> <li>▪ Did they refuse care? [Code: Was not willing to provide care]</li> <li>▪ Did they require parental consent? [Code: Directive counseling or unnecessary procedures]</li> <li>▪ Did they tell the patient what they should do rather than finding out what they wanted? [Code: Directive counseling or unnecessary procedures]</li> </ul> <p><b><u>Married adult seeking a medical abortion</u></b></p> <ul style="list-style-type: none"> <li>▪ Did they refuse care? [Code: Was not willing to provide care]</li> <li>▪ Did they insult the client [Code: Displayed stigmatizing attitudes]</li> <li>▪ Do they try to validate <u>why</u> the client is asking for an abortion (other than legal eligibility) [Code: Directive counseling or unnecessary procedures]</li> <li>▪ Did they know what the law is (e.g., in what situations abortion is permitted and what the woman needs to demonstrate – nothing)?</li> <li>▪ Did they require partner consent? [Code: Directive counseling or unnecessary procedures]</li> </ul> |
|--------------------------------------------------------------------------------------------------------------------------------------------------------------------------------------------------------------------------------------------------------------------------------------------------------------------------------------------------------------------------------------------------------------------------------------------------------------------------------------------------------------------------------------------------------------------------------------------------------------------------------------------------------------------------------------------------------------------------------------------------------------------------------------------------------------------------------------------------------------------------------------------------------------------------------------------------------------------------------------------------------------------------------------------------------------------------------------------------------------------------------------------------------------------------------------------------------------------------------------------------------------------------------------------------------------------------------------------------------------------------------|

## Client Demographic Data

Interview number; Sex; Marital status; Education; Parity (birth); Age; Facility where gave birth

**Table 1: Client Codebook**

| CODE                                                                                        | EXPLANATION                                                                                                                                                                                                               |
|---------------------------------------------------------------------------------------------|---------------------------------------------------------------------------------------------------------------------------------------------------------------------------------------------------------------------------|
| <b>PERCEPTIONS OF FACILITY-BASED DELIVERY</b>                                               |                                                                                                                                                                                                                           |
| GROUP: Explanations for client use or non-use of facility-based labor and delivery services | How client understands why some women do not come to deliver at health facilities; their assessment of the validity of these rationales                                                                                   |
| Reason for nonuse: Language barriers                                                        | Specific rationales mentioned                                                                                                                                                                                             |
| Reason for nonuse: Culture                                                                  |                                                                                                                                                                                                                           |
| Reason for nonuse: Lack of education                                                        |                                                                                                                                                                                                                           |
| Reason for nonuse: Distance to facility                                                     |                                                                                                                                                                                                                           |
| Reason for nonuse: Poor facility quality                                                    |                                                                                                                                                                                                                           |
| <b>PERCEPTIONS OF MIDWIVES</b>                                                              |                                                                                                                                                                                                                           |
| GROUP: Perceptions of midwives' quality of services                                         | Respondent's assessment of how good or bad the care that midwives provide is generally<br><i>(use mistreatment codes for reasons for negative perceptions of midwives)</i>                                                |
| Positive perception midwives                                                                |                                                                                                                                                                                                                           |
| Negative perception midwives                                                                |                                                                                                                                                                                                                           |
| Reason positive: Reassuring midwife                                                         |                                                                                                                                                                                                                           |
| Reason positive: Knowledgeable/competent midwife                                            |                                                                                                                                                                                                                           |
| Reason positive: Friendly/relaxed midwife                                                   |                                                                                                                                                                                                                           |
| Reason positive: Coffee ceremony                                                            |                                                                                                                                                                                                                           |
| Reason positive: Quick labor                                                                |                                                                                                                                                                                                                           |
| Reason positive: Food and drink provided                                                    |                                                                                                                                                                                                                           |
| Reason positive: Easy labor (lack of pain, complications, etc)                              |                                                                                                                                                                                                                           |
| Reason negative: Complicated labor, poor outcome                                            |                                                                                                                                                                                                                           |
| GROUP: Perceptions of male vs. female midwives                                              | Whether the client expresses any preference – or none at all – about midwives                                                                                                                                             |
| Prefer male midwife                                                                         |                                                                                                                                                                                                                           |
| Prefer female midwife                                                                       |                                                                                                                                                                                                                           |
| No preference male/female midwife                                                           |                                                                                                                                                                                                                           |
| Reason prefer male: competence, professionalism                                             |                                                                                                                                                                                                                           |
| Reason prefer male: greater empathy                                                         |                                                                                                                                                                                                                           |
| Reason prefer female: modesty                                                               |                                                                                                                                                                                                                           |
| Reason prefer female: familiarity                                                           |                                                                                                                                                                                                                           |
| <b>OWN &amp; OBSERVED EXPERIENCE OF LABOR AND DELIVERY</b>                                  |                                                                                                                                                                                                                           |
| GROUP: Personal experience of care during labor & delivery                                  | Client satisfaction with their care in L&D<br><br><i>Use “<b>reason positive</b>” midwifery codes to code conversation about birth experience, and abuse/quality codes to code conversation about negative experience</i> |
| Personal experience L&D: good                                                               |                                                                                                                                                                                                                           |
| Personal experience L&D: bad                                                                |                                                                                                                                                                                                                           |
| Personal experience L&D: mediocre                                                           |                                                                                                                                                                                                                           |
| GROUP: Context of abuse                                                                     | Whether the respondent is discussing own experience, observed experience or what have heard others experience                                                                                                             |
| Own abuse discussed                                                                         |                                                                                                                                                                                                                           |
| Observed abuse discussed                                                                    |                                                                                                                                                                                                                           |
| Anecdotal abuse discussed                                                                   |                                                                                                                                                                                                                           |
| No abuse found/discussed                                                                    |                                                                                                                                                                                                                           |
| GROUP: Abuse type                                                                           |                                                                                                                                                                                                                           |
| Interpersonal mistreatment                                                                  |                                                                                                                                                                                                                           |
| Service delivery mistreatment                                                               |                                                                                                                                                                                                                           |
| GROUP: Violations of <i>privacy</i> during labor and delivery                               | Whether and how the respondent describes any violations of privacy during her delivery                                                                                                                                    |
| Abuse privacy: Patient left uncovered                                                       |                                                                                                                                                                                                                           |
| Abuse privacy: Public vaginal exams                                                         |                                                                                                                                                                                                                           |
| Confidentiality violated during labor and delivery                                          | Whether the respondent describes any violations of confidentiality during her delivery                                                                                                                                    |

| CODE                                                                             | EXPLANATION                                                                                                                    |
|----------------------------------------------------------------------------------|--------------------------------------------------------------------------------------------------------------------------------|
| GROUP: Verbal Abuse                                                              | Whether the midwife has insulted/berated the respondent, or whether the respondent has heard the midwife berate other patients |
| Verbal abuse: insults/rudeness                                                   |                                                                                                                                |
| Verbal abuse: shouting/yelling/harsh tones                                       |                                                                                                                                |
| Verbal abuse: mocking/dismal                                                     |                                                                                                                                |
| GROUP: Positioning for birth                                                     | Respondent experience of bodily position for childbirth; whether or not she was allowed to choose her preferred position.      |
| Allowed to choose birthing position                                              |                                                                                                                                |
| Not allowed to choose birthing position                                          |                                                                                                                                |
| Not allowed to chose birthing position: health of baby cited                     |                                                                                                                                |
| GROUP: Presence of <i>relatives</i> during labor and delivery (if desired)       | Whether respondent's relatives were present at labor and delivery; whether she requested this; whether she wanted this         |
| No accompaniment: did not want                                                   |                                                                                                                                |
| No accompaniment: did not want: privacy concerns                                 |                                                                                                                                |
| No accompaniment: did not want: do not want to worry relatives                   |                                                                                                                                |
| No accompaniment: wanted but not allowed                                         |                                                                                                                                |
| GROUP: Poor clinical practice                                                    | Whether the respondent mentioned poor clinical practice during the course of the care                                          |
| Poor clinical practice: improper medication                                      |                                                                                                                                |
| Poor clinical practice: denial of pain medication, procedures without anesthesia |                                                                                                                                |
| Poor clinical practice: abandonment                                              |                                                                                                                                |
| Poor clinical practice: unnecessary procedures                                   |                                                                                                                                |
| Poor clinical practice: slow service, long wait                                  |                                                                                                                                |
| GROUP: Other Abuse                                                               |                                                                                                                                |
| Lack of communication about procedures being performed                           | Whether the midwife communicated about procedures that were to be performed                                                    |
| Physical abuse: Hitting/slapping/pinching of patients                            |                                                                                                                                |
| GROUP: Explanations for violations of rights observed/experienced                |                                                                                                                                |
| Explanation abuse: inadequacy of equipment in the health facility                |                                                                                                                                |
| Explanation abuse: Poorly educated patients                                      |                                                                                                                                |
| Explanation abuse: High patient load, heavy workload                             |                                                                                                                                |
| Explanation abuse: Stress                                                        |                                                                                                                                |
| Explanation abuse: Language/communication barrier                                |                                                                                                                                |
| Explanation abuse: Uncooperative patient                                         |                                                                                                                                |
| Explanation abuse: Lack of patient education                                     |                                                                                                                                |
| GROUP: Suggestions for improving practice                                        |                                                                                                                                |
| To improve: make interactions more fun and lighthearted                          |                                                                                                                                |
| To improve: prioritization of high risk patients                                 |                                                                                                                                |

### **Features of interviews with women/patients/clients**

Responses ever more than one sentence? Questions understood or not? Ability to ask questions during interview?
